# Supplementary material for: Model-based vascular elastography improves the detection of flow-induced carotid artery remodeling in mice
Source: PubMed Central journal article supplement (PMC5608712; doi:10.1038/s41598-017-12321-7), 2017-09-21
Supplement: 41598_2017_12321_MOESM1_ESM.pdf [file 41598_2017_12321_MOESM1_ESM.pdf]

## Supplementary information

**Title:** Model-based vascular elastography improves the detection of flow-induced carotid artery remodeling in mice

**Short title:** Carotid elastography in mice

**Authors:** Vyacheslav A. Korshunov<sup>1,2,\*</sup>, Hexuan Wang<sup>3</sup>, Rifat Ahmed<sup>3</sup>, Deanne M. Mickelsen<sup>1</sup>, Qian Zhou<sup>1</sup>, Chen Yan<sup>1,\*</sup>, and Marvin M. Doyley<sup>3,\*</sup>

<sup>1</sup>Aab Cardiovascular Research Institute, Department of Medicine, and <sup>2</sup>Biomedical Genetics, University of Rochester School of Medicine and Dentistry, Rochester, NY USA; <sup>3</sup>Department of Electrical & Computer Engineering, University of Rochester and Hajim School of Engineering & Applied Sciences, Rochester, NY USA

\*To whom correspondence should be addressed:

Vyacheslav “Slava” A. Korshunov, PhD  
University of Rochester School of Medicine and Dentistry  
Aab Cardiovascular Research Institute  
601 Elmwood Ave, Box CVRI  
Rochester, NY 14642  
Phone: 585 276 7705  
Fax: 585 276 1530  
E-mail:  
Slava\_Korshunov@URMC.rochester.edu

Co-corresponding author

Chen Yan, PhD  
University of Rochester School of Medicine and Dentistry  
Aab Cardiovascular Research Institute  
601 Elmwood Ave, Box CVRI  
Rochester, NY 14642  
Phone: 585 276 7704  
Fax: 585 276 1530  
E-mail:  
Chen\_Yan@URMC.rochester.edu

Co-corresponding author

Marvin M. Doyley, PhD  
University of Rochester  
Hajim School of Engineering and Applied Sciences  
333 Hopeman Engineering Building, Box 270126  
Rochester NY 14627  
Tel: 585 275 3774  
Fax: 585 273 4919  
E-mail: m.doyley@rochester.edu

**Table S1. Left carotid ligation procedure had no effect on cardiac function in FVB mice over 2 weeks time-course.**

| Parameter                | Group | 1 week      |              | 2 weeks     |              |
|--------------------------|-------|-------------|--------------|-------------|--------------|
|                          |       | Sham, n=5   | Ligated, n=5 | Sham, n=5   | Ligated, n=6 |
| Heart rate, beats/min    |       | 566 ± 13    | 559 ± 9      | 580 ± 9     | 570 ± 11     |
| Systolic diameter, mm    |       | 1.88 ± 0.08 | 1.93 ± 0.11  | 1.84 ± 0.06 | 1.83 ± 0.09  |
| Diastolic diameter, mm   |       | 3.26 ± 0.13 | 3.34 ± 0.11  | 3.32 ± 0.08 | 3.24 ± 0.13  |
| Systolic volume, µL      |       | 11 ± 1      | 12 ± 2       | 10 ± 1      | 10 ± 1       |
| Diastolic volume, µL     |       | 44 ± 4      | 46 ± 4       | 45 ± 3      | 42 ± 3       |
| Stroke volume, µL        |       | 32 ± 3      | 34 ± 3       | 34 ± 2      | 32 ± 2       |
| Ejection fraction, %     |       | 75 ± 1      | 74 ± 3       | 77 ± 1      | 76 ± 2       |
| Fractional shortening, % |       | 42 ± 1      | 42 ± 3       | 44 ± 1      | 44 ± 1       |
| Cardiac output, mL/min   |       | 19 ± 2      | 19 ± 2       | 20 ± 1      | 18 ± 1       |
| LV mass, mg              |       | 67 ± 5      | 69 ± 6       | 72 ± 6      | 63 ± 7       |
| LV mass corrected, mg    |       | 54 ± 4      | 55 ± 5       | 58 ± 5      | 50 ± 5       |

LV, left ventricular. Parameters are shown as mean±SEM. n, number per group.

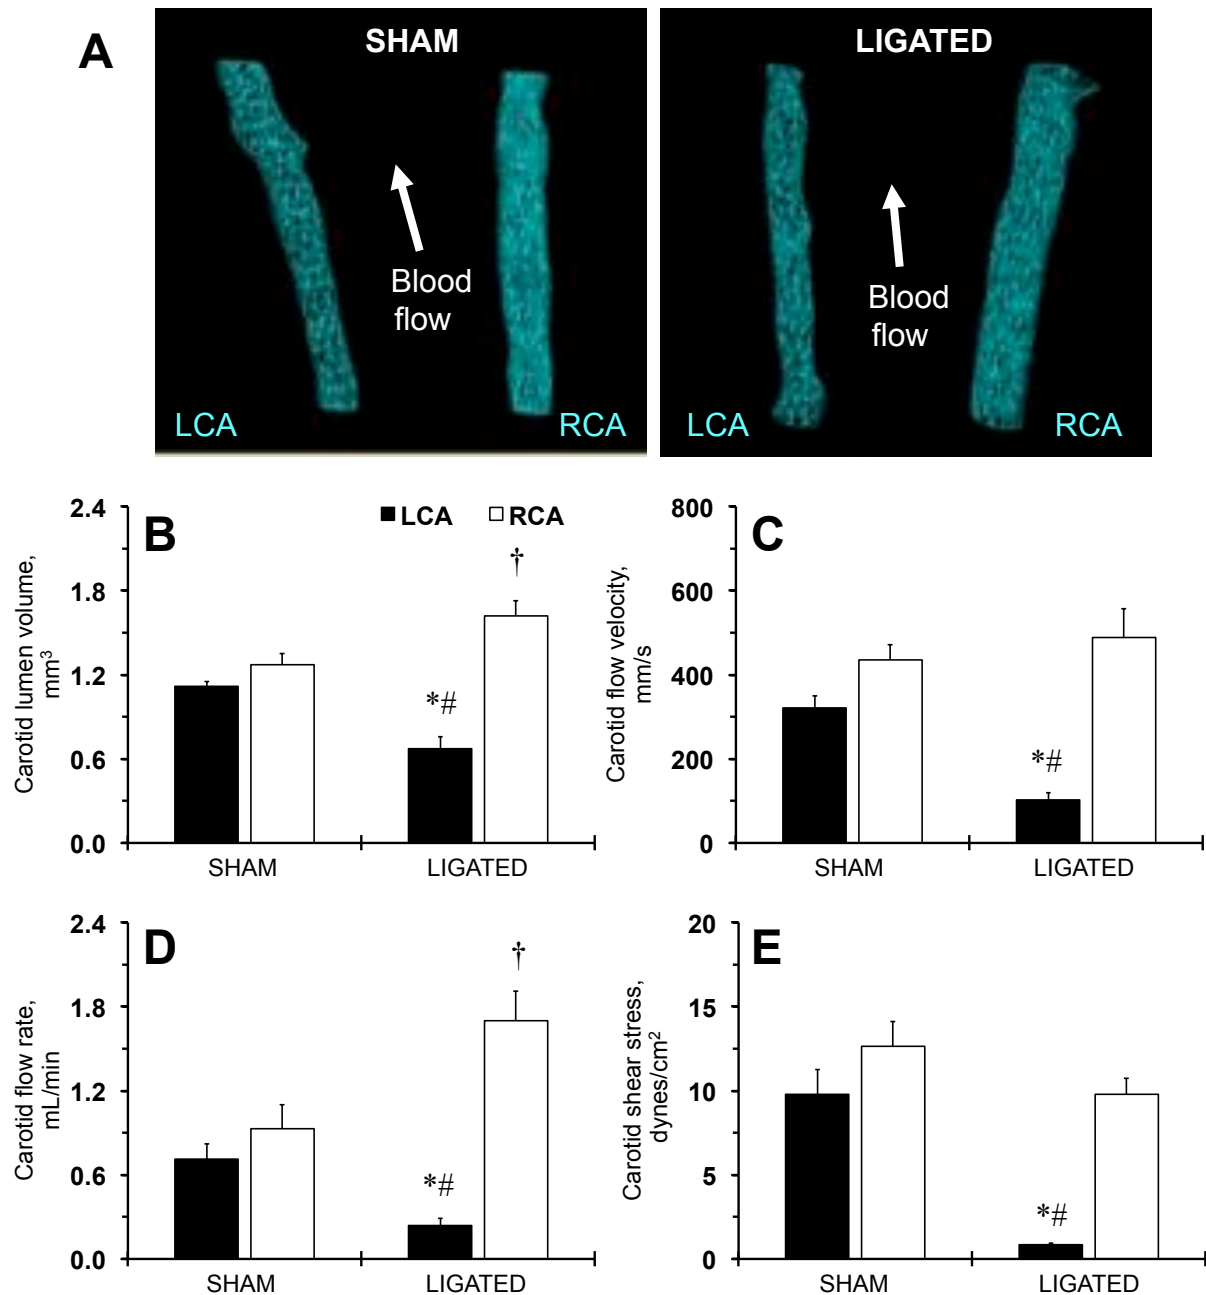

**Figure S1. Hemodynamic changes in carotid arteries determined by ultrasound in FVB mice one week after ligation.** **A.** Representative 3D-images of the lumen of the sham-operated (SHAM) or ligated (LIGATED) mice. LCA, left carotid artery. RCA, right carotid artery. Arrows show direction of the blood flow. **B.** Carotid lumen volume, mm<sup>3</sup>. **C.** Carotid blood flow velocity rate, mm/s. **D.** Carotid blood flow volume rate, mL/min. **E.** Carotid shear stress, dynes/cm<sup>2</sup>. Black bars are LCA. Open bars – RCA. SHAM and LIGATED mice are shown on X-axis. Values are mean±SEM. \*, p<0.05 vs. LCA, SHAM. †, p<0.05 vs. RCA, SHAM. #, p<0.05 vs. RCA, LIGATED. n=5-6 per group

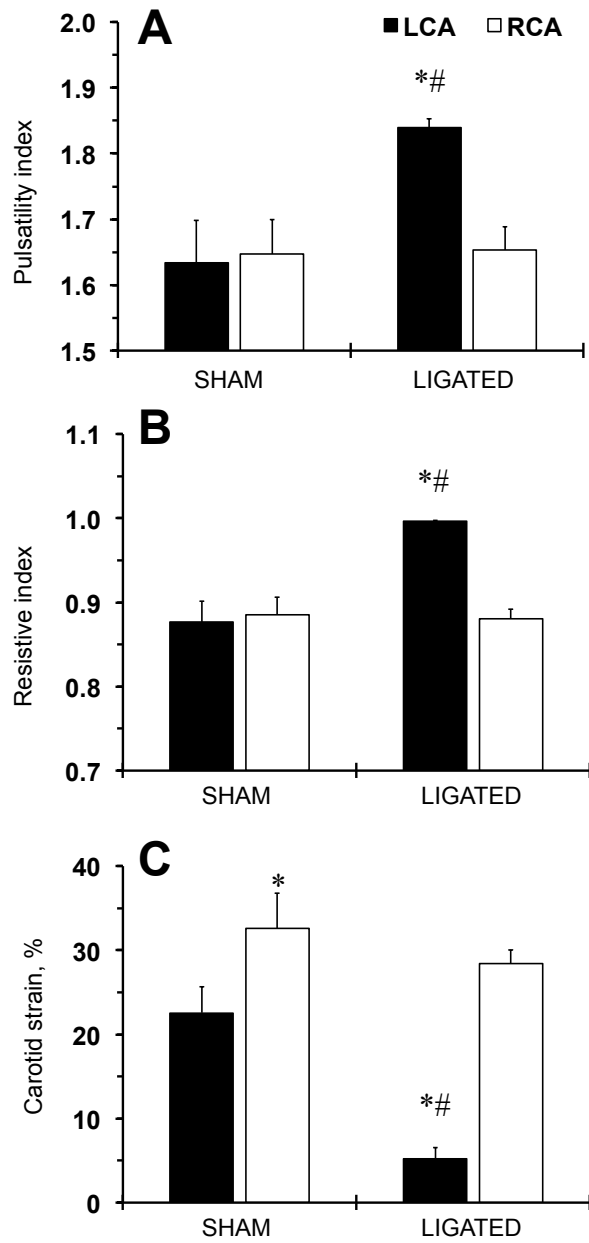

**Figure S2. Ultrasound profiles of the carotid artery wall in FVB mice one week after ligation. A.** Carotid artery pulsatility index. **B.** Carotid artery resistive index. **C.** Carotid artery strength, %. Black bars are left carotid artery (LCA). Open bars – right carotid artery (RCA). SHAM and LIGATED mice are shown on X-axis. Values are mean±SEM. \*, p<0.05 vs. LCA, SHAM. #, p<0.05 vs. RCA, LIGATED. n=5-6 per group

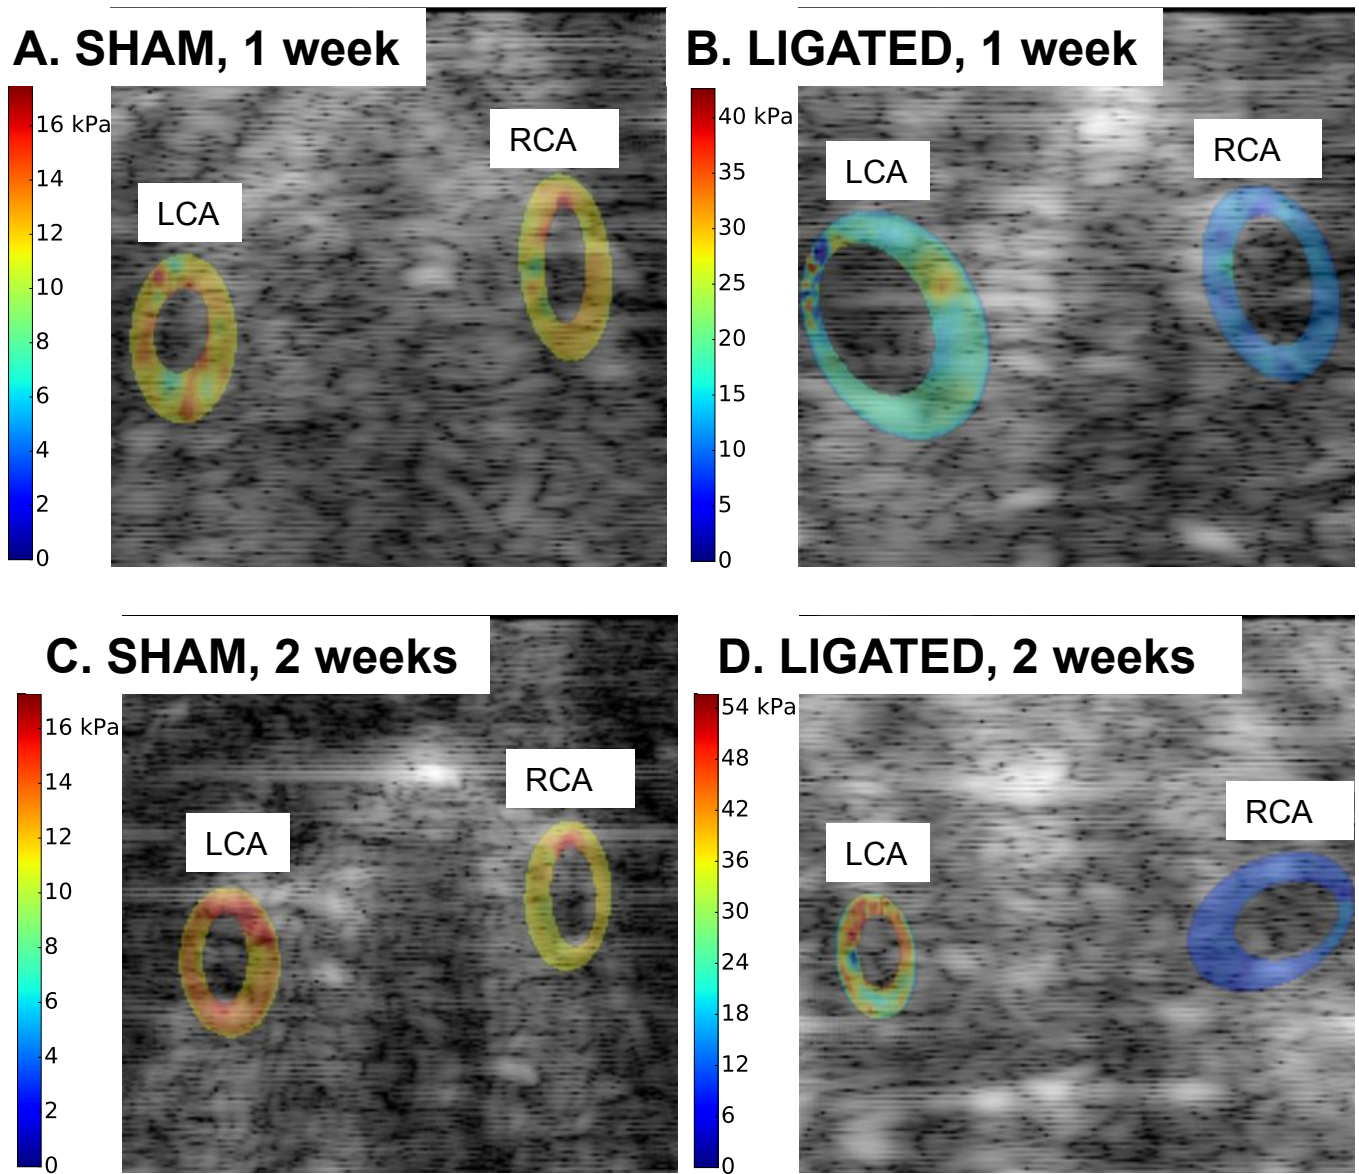

**Figure S3. Elastography profiles of the carotid arteries in FVB mice after ligation.** Computed sonograms of the carotid arteries from the same animal at 1 week (A) or 2 weeks (C) after sham operation. Computed sonograms of the carotid arteries from the same animal at 1 week (B) or 2 weeks (D) after ligation. LCA, left carotid artery. RCA, right carotid artery. The Young's modulus is color-coded: lowest (zero) is set to blue color; highest value (16 or 40 or 54 kPa) is in red

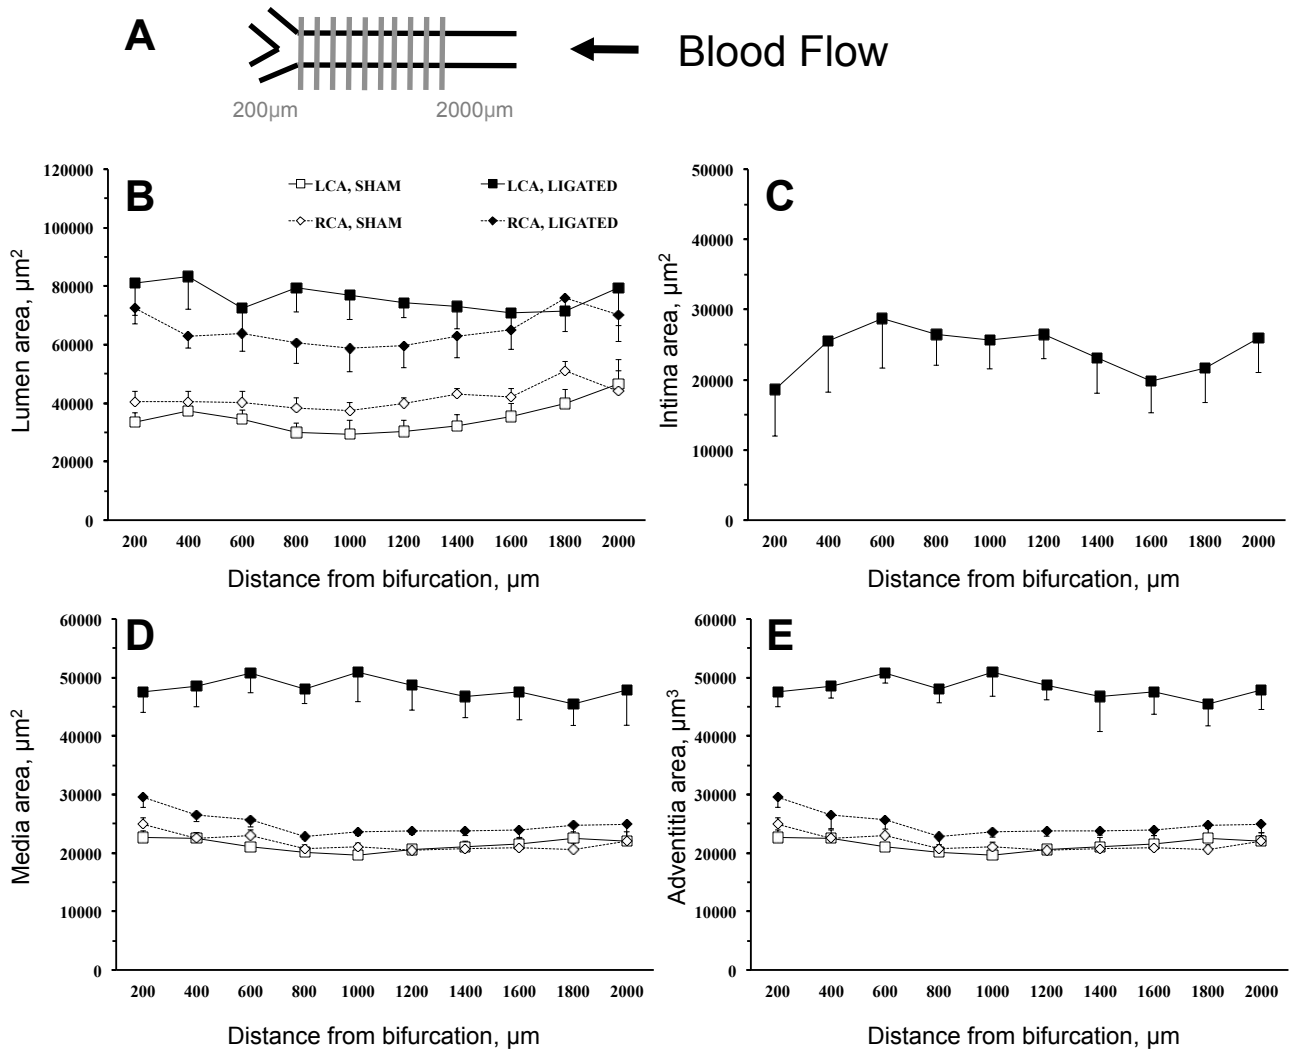

**Figure S4. The carotid component areas are plotted versus the length of the carotid arteries cross-sections from FVB mice with or without ligation. A.** A cartoon showing carotid artery at the bifurcation point. Series of cross-sections marked with grey perpendicular lines (every 200  $\mu\text{m}$ ) are covering 2,000  $\mu\text{m}$  carotid artery length. Arrow shows direction of blood flow. **B.** Lumen area distribution. **C.** Intima area distribution. It was not possible to measure the intimal layer in non-ligated arteries. **D.** Media area distribution. **E.** Adventitia area distribution. Black lines and open squares are left carotid artery (LCA) from SHAM-operated mice. Interrupted lines and open rhombs are right carotid artery (RCA) from SHAM-operated mice. Black lines and black squares are LCA from LIGATED mice. Interrupted lines and black rhombs are RCA from LIGATED mice. X-axis shows distance from carotid bifurcation,  $\mu\text{m}$ . Values are mean $\pm$ SEM. n=5-6 per group

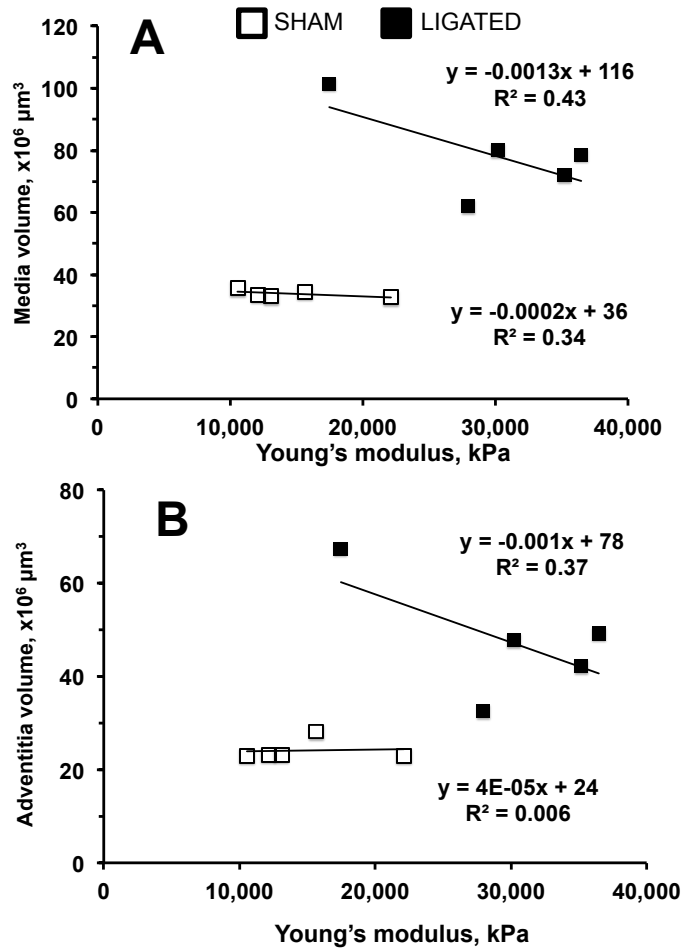

**Figure S5. Relationships between the Young's modulus and the left carotid remodeling in FVB mice after 2 weeks after ligation.** Open squares are sham-operated animals (SHAM). Black squares are ligated mice (LIGATED). Media volume (**A**) and Adventitia volume (**B**) negatively correlate with the Young's modulus after ligation. No correlation was noted in shams. n=5 per group
